# Supplementary material for: Synthesis, characterization, and electrochemical properties of new highly processable, hole-transporting fluorocyclic aryl amine polymers
Source: Royal Society of Chemistry journal article supplement (doi:10.1039/c6py00966b), 2016-01-01
Supplement: c6py00966b1.pdf [file c6py00966b1.pdf]

SUPPORTING INFORMATION

**Synthesis, Characterization, and Electrochemical Properties of New Highly  
Processable, Hole-Transporting Fluorocyclic Aryl Amine Polymers**

N. P. Godman, D. B. Barbee, F. B. Carty, C. D. McMillen,<sup>‡</sup>  
C. A. Corley, E. Shurdha, and S. T. Iacono\*

*Department of Chemistry and Chemistry Research Center,  
United States Air Force Academy, Colorado Springs, Colorado 80840 (USA)*

*<sup>‡</sup>Department of Chemistry, Clemson University, Clemson, SC 29634 (USA)*

\*Correspondence E-mail: [scott.iacono@usafa.edu](mailto:scott.iacono@usafa.edu)

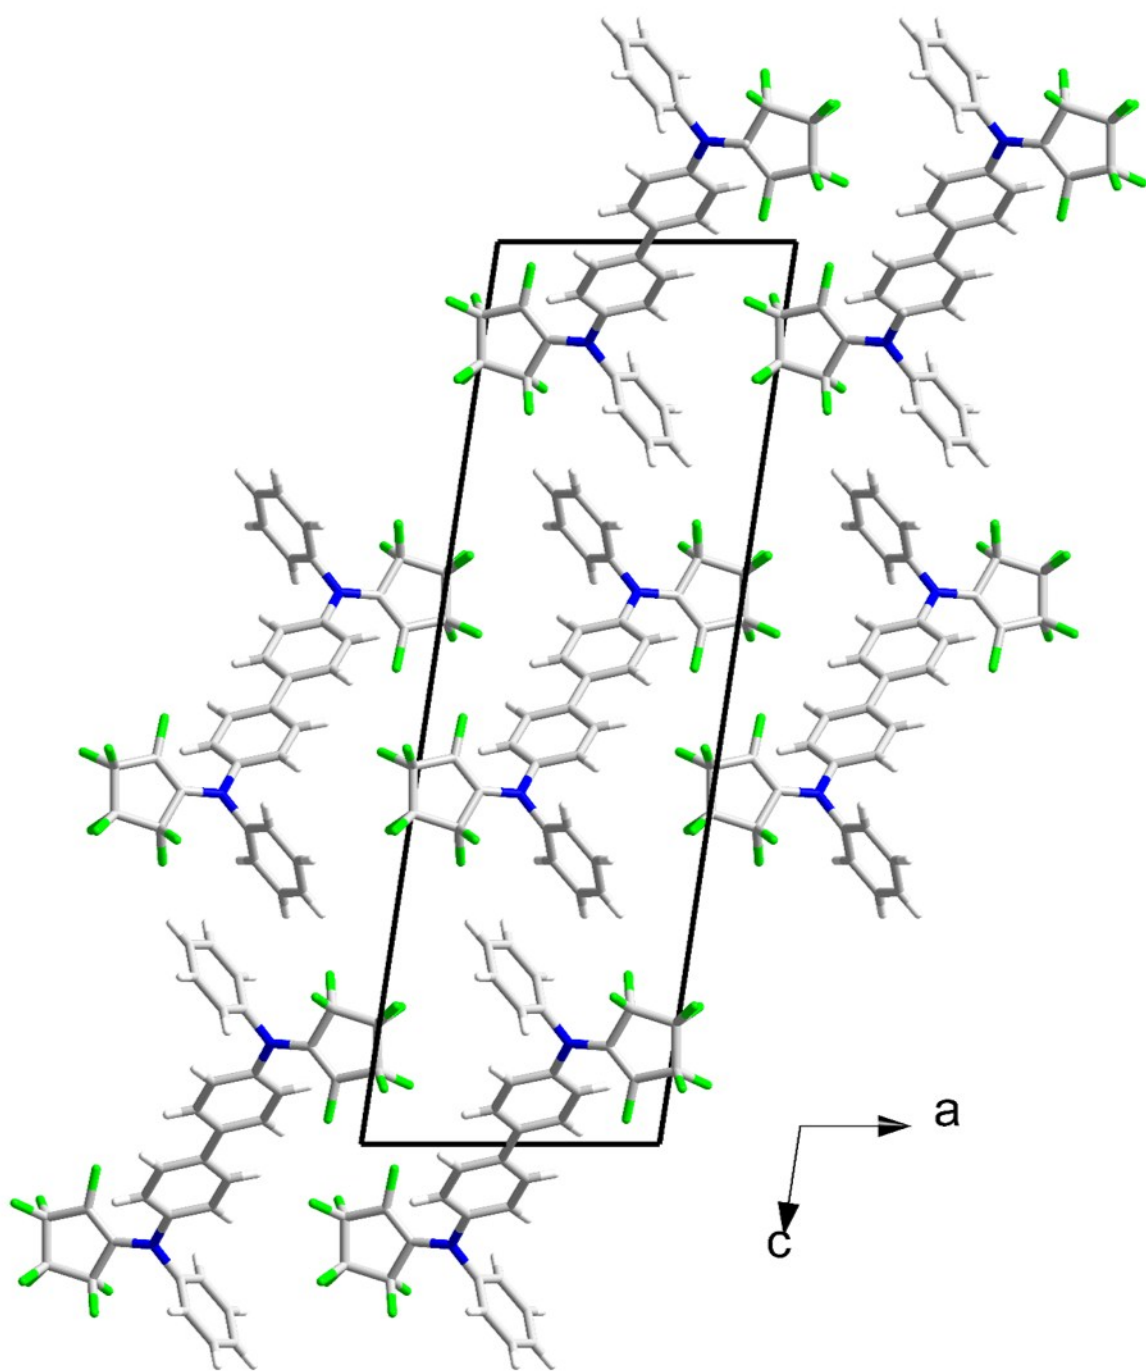

**Fig. S1** Packing arrangement of the monomer 2 viewed along [010].

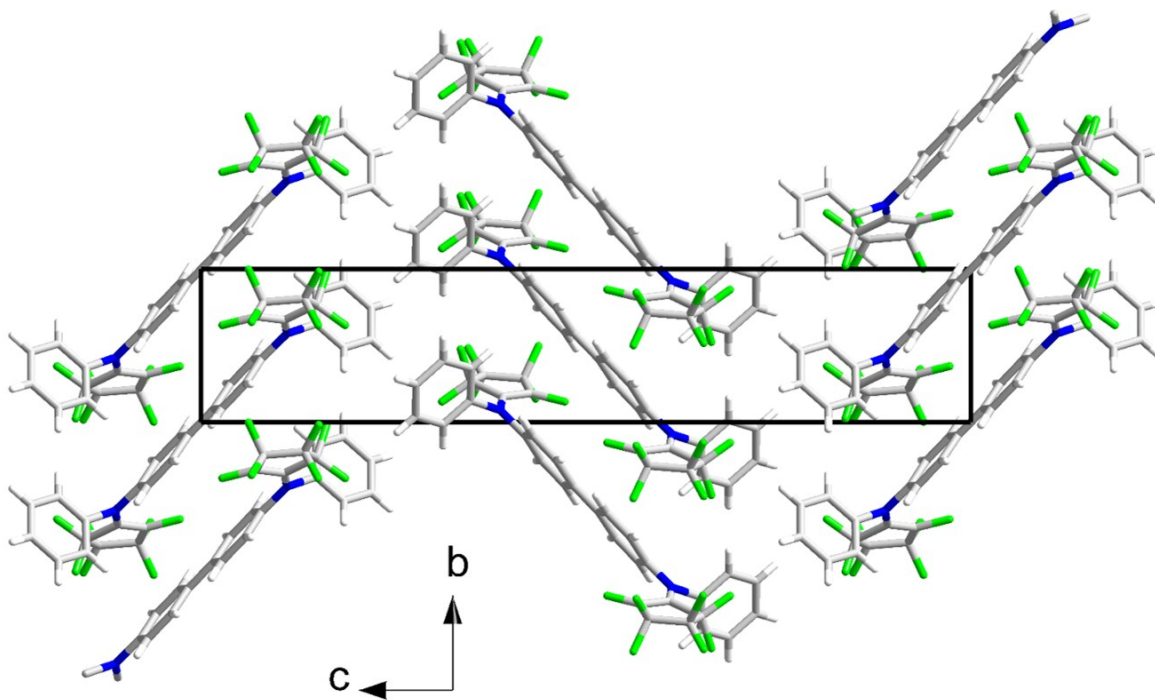

**Fig. S2** Packing arrangement of monomer **2** viewed along [100].

**Table S1.** Crystallographic data for monomer **2**.

|                                                   |                                                                |
|---------------------------------------------------|----------------------------------------------------------------|
| empirical formula                                 | C <sub>34</sub> H <sub>18</sub> F <sub>14</sub> N <sub>2</sub> |
| CCDC deposition no.                               | 1479096                                                        |
| FW                                                | 720.50                                                         |
| crystal system                                    | monoclinic                                                     |
| crystal dimension, mm                             | 0.07 x 0.18 x 0.61                                             |
| space group, <i>Z</i>                             | <i>P</i> 2 <sub>1</sub> / <i>c</i> (no. 14), 2                 |
| <i>T</i> , K                                      | 293                                                            |
| <i>a</i> , Å                                      | 9.539(5)                                                       |
| <i>b</i> , Å                                      | 5.738(3)                                                       |
| <i>c</i> , Å                                      | 29.193(15)                                                     |
| <i>β</i> , °                                      | 98.613(17)                                                     |
| <i>V</i> , Å <sup>3</sup>                         | 1580.0(14)                                                     |
| <i>d</i> <sub>calc</sub> , g cm <sup>-3</sup>     | 1.514                                                          |
| <i>μ</i> (Mo Kα), mm <sup>-1</sup>                | 0.147                                                          |
| <i>T</i> <sub>min</sub>                           | 0.8732                                                         |
| <i>T</i> <sub>max</sub>                           | 1.0000                                                         |
| 2θ range                                          | 2.75-25.14                                                     |
| Reflections collected                             | 12052                                                          |
| Unique reflections                                | 2817                                                           |
| Observed reflections ( <i>I</i> > 2σ( <i>I</i> )) | 2089                                                           |
| No. of Restraints                                 | 0                                                              |
| No. of Parameters                                 | 236                                                            |
| final R [ <i>I</i> > 2σ( <i>I</i> )] R1, wR2      | 0.0657/0.1289                                                  |
| final R (all data) R1, wR2                        | 0.0868/0.1456                                                  |
| GoF                                               | 1.081                                                          |
| largest diff. peak/hole, e/ Å <sup>3</sup>        | 0.209/-0.293                                                   |
| Extinction coefficient                            | 0.014(2)                                                       |
